# Supplementary material for: Green fabrication of nanoporous BiVO4 films on ITO substrates for photoelectrochemical water-oxidation
Source: Royal Society of Chemistry journal article supplement (doi:10.1039/c8ra05831h), 2018-01-01
Supplement: c8ra05831h1.pdf [file c8ra05831h1.pdf]

*Supporting Information*

**Green Fabrication of Nanoporous BiVO<sub>4</sub> Films on ITO Substrates  
for Photoelectrochemical Water-oxidation**

Sayuri Okunaka<sup>a</sup>, Yutaka Hitomi<sup>b</sup> and Hiromasa Tokudome<sup>a\*</sup>

<sup>a</sup> Research Institute, TOTO LTD., 2-8-1 Honson, Chigasaki, Kanagawa 253-8577, Japan.

<sup>b</sup> Department of Molecular Chemistry and Biochemistry, Faculty of Science and Engineering,  
Doshisha University, 1-3 Tatara Miyakodani, Kyotanabe, Kyoto 610-0321, Japan.

To whom corresponding author should be addressed.

Tel: +81-467-54-3384; Fax: +81-467-54-1185; E-mail: hiromasa.tokudome@jp.toto.com

## Results

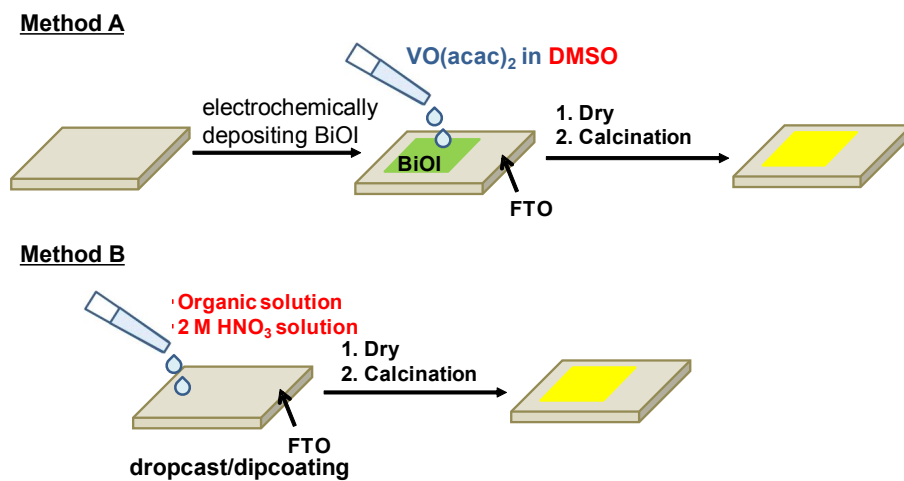

Figure S1 Conventional fabrication methods of  $\text{BiVO}_4$  photoanodes.

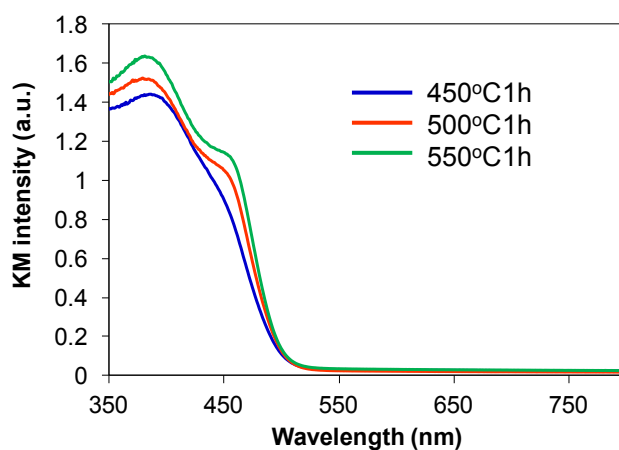

Figure S2. Diffuse reflectance spectra of  $\text{BiVO}_4$  electrodes prepared by coating an aqueous precursor solution (pH 9) followed by dryness and calcination at 450, 500, and 550°C for 1h.

Table S1. Stretching Raman shift of V-O bond and bond length of V-O on BiVO<sub>4</sub> electrodes prepared under different conditions.

| Preparation conditions      |              | Stretching Raman<br>shift V-O bond<br>(cm <sup>-1</sup> ) | V-O bond<br>length (Å) |
|-----------------------------|--------------|-----------------------------------------------------------|------------------------|
| pH of precursor<br>solution | Calcinations |                                                           |                        |
| 4                           | 500°C1h      | 826                                                       | 1.696                  |
| 5                           | 500°C1h      | 826                                                       | 1.696                  |
| 6                           | 500°C1h      | 826                                                       | 1.696                  |
| 7                           | 500°C1h      | 826                                                       | 1.696                  |
| 8                           | 500°C1h      | 826                                                       | 1.696                  |
| 9                           | 450°C1h      | 826                                                       | 1.696                  |
| 9                           | 450°C2h      | 826                                                       | 1.696                  |
| 9                           | 500°C1h      | 825                                                       | 1.697                  |
| 9                           | 500°C2h      | 827                                                       | 1.695                  |
| 9                           | 500°C3h      | 826                                                       | 1.696                  |
| 9                           | 550°C1h      | 827                                                       | 1.695                  |
| 9                           | 550°C2h      | 827                                                       | 1.695                  |

\*calculated using the empirical equation:  $\nu(\text{cm}^{-1}) = 21349 \exp[-1.9176 R(\text{Å})]^{R1}$

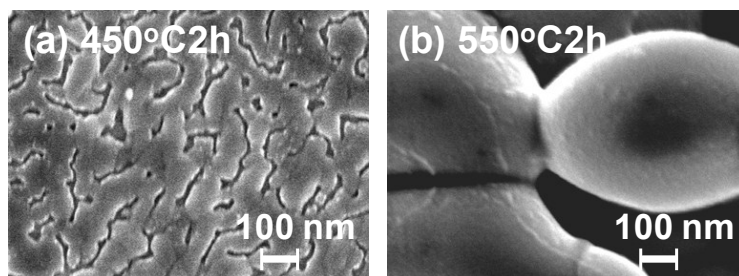

Figure S3. Surface SEM images of BiVO<sub>4</sub> electrodes (4 coat) prepared under different calcination conditions ((a)450°C for 2h, (b) 550°C for 2h).

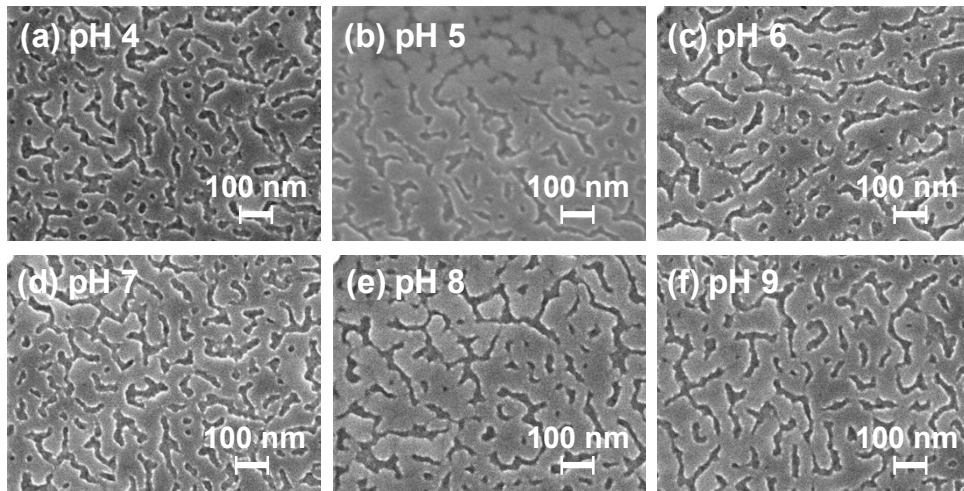

Figure S4. Surface SEM images of BiVO<sub>4</sub> electrodes (4 coat) prepared by using aqueous solution in a range of pH 4 to 9. All films were calcined at 500°C for 1h.

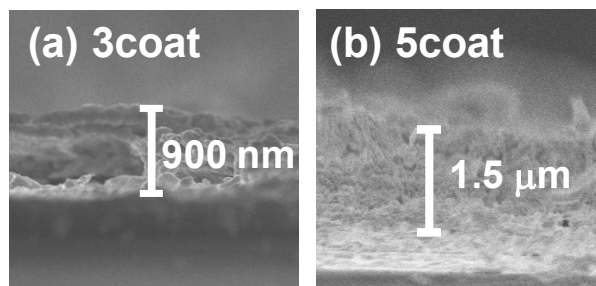

Figure S5. Cross-sectional SEM images of BiVO<sub>4</sub> electrodes with different coating times ((a) 3 coat, (b) 5 coat)). All films were calcined at 500°C for 1h.

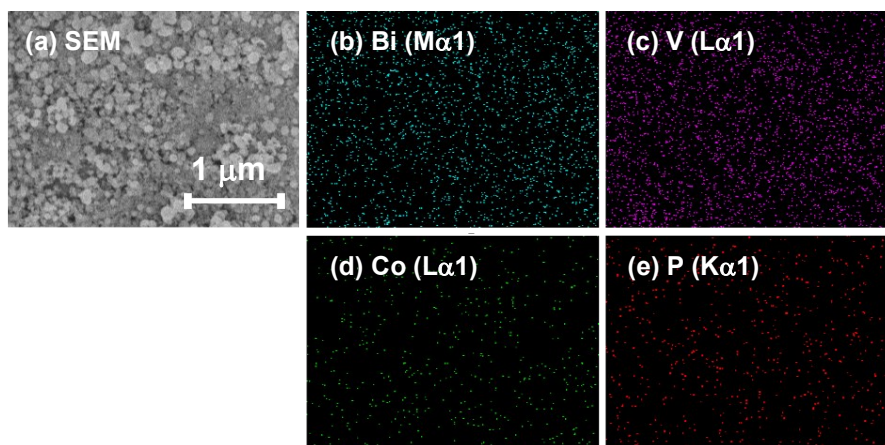

Figure S6. The top view SEM (a) and elemental mapping (b-e) images of the surface of CoPi-loaded BiVO<sub>4</sub> photoanode (4 coat-500C1h).

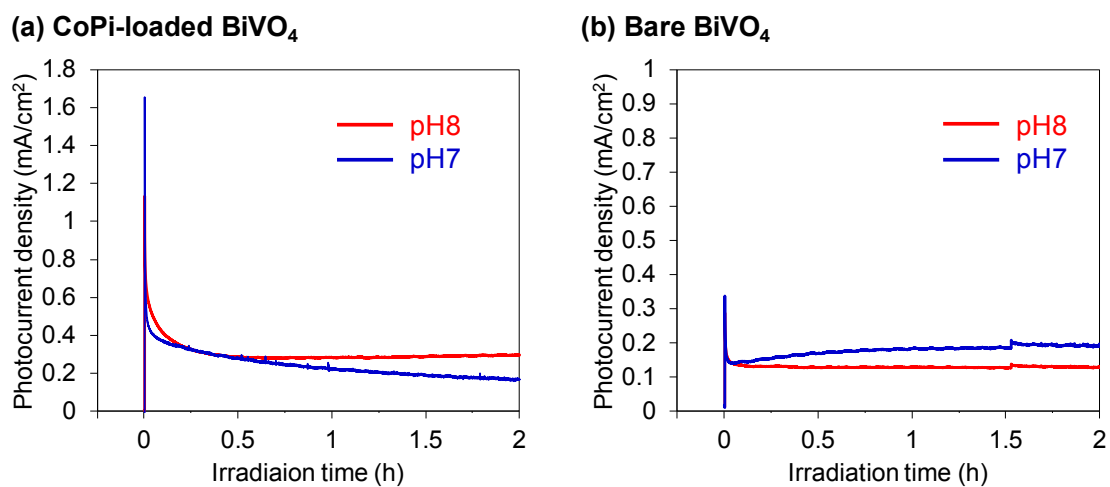

Figure S7. The amperometric  $I-t$  curves of (a) Co-Pi loaded BiVO<sub>4</sub> photoanode (4 coat-500C1h) and (b) BiVO<sub>4</sub> photoanode (4 coat-500C1h) under continuous illumination at 0.8 V vs. RHE.

**References:**

R1) S. Tokunaga, H. Kato and A. Kudo, *Chem. Mater.*, 2001, **13**, 4624–4628.
